# Supplementary material for: Chronic Thromboembolic Pulmonary Hypertension in Females: Clinical Features and Survival
Source: MDPI journal article supplement (doi:10.3390/jcdd9090308), 2022-09-16
Supplement: s1 [file s1]

**Table S1. Clinical characteristics and outcomes in female vs male CTEPH Patients.**

| Variables                                     | Female (n=160)           | Male (n=190)             | P value |
|-----------------------------------------------|--------------------------|--------------------------|---------|
| <b>Characteristics</b>                        |                          |                          |         |
| Age                                           | 54.7±13.8                | 50.7±15.4                | 0.012   |
| BMI (kg/m <sup>2</sup> )                      | 23.6±3.3                 | 24.1±3.7                 | 0.178   |
| Smoking                                       | 2 (1.3)                  | 101 (53.2)               | <0.001  |
| Alcohol Drinking                              | 0 (0.0)                  | 60 (31.6)                | <0.001  |
| History of VTE                                | 113 (70.6)               | 157 (82.6)               | 0.008   |
| Time from first symptom to diagnosis (months) | 24.4 [9.1,60.78]         | 24.3 [7.5,48.7]          | 0.449   |
| WHO FC III/IV                                 | 108 (67.5)               | 105 (55.3)               | 0.020   |
| 6MWD (m)                                      | 377 [342,442]            | 406.5 [342,453]          | 0.053   |
| <b>Hemodynamics</b>                           |                          |                          |         |
| Systolic PAP (mmHg)                           | 84.7±23.6                | 82.9±21.2                | 0.446   |
| Diastolic PAP (mmHg)                          | 31.0 [25.5,36.5]         | 31.0 [25.0,37.0]         | 0.961   |
| mean PAP (mmHg)                               | 50.6±13.0                | 49.3±11.9                | 0.315   |
| mean RAP (mmHg)                               | 7.0 [4.0,10.0]           | 8.0 [6.0,11.0]           | 0.007   |
| PAWP (mmHg)                                   | 10.0 [8.0,12.0]          | 10.0 [8.0,12.0]          | 0.116   |
| PVR (Wood units)                              | 9.68 [6.81,12.66]        | 8.07 [5.93,11.11]        | 0.004   |
| CO (L/min)                                    | 4.32 [3.69,4.96]         | 4.66 [3.90,5.40]         | 0.005   |
| CI (L/(min.m <sup>2</sup> ))                  | 2.47 [2.14,2.90]         | 2.47 [2.08,2.80]         | 0.516   |
| SvO <sub>2</sub> (%)                          | 61.1 [56.9,65.9]         | 63.5 [59.6,68.5]         | 0.002   |
| <b>Laboratory tests</b>                       |                          |                          |         |
| HGB (g/L)                                     | 143.0 [129.0,155.0]      | 155.0 [144.0,166.0]      | <0.001  |
| WBC (×10 <sup>9</sup> )                       | 5.71 [4.81,6.97]         | 6.33 [5.10,7.54]         | 0.005   |
| PLT (×10 <sup>9</sup> )                       | 199.0 [162.0,258.5]      | 182.0 [146.0,223.0]      | 0.001   |
| NT-proBNP (ng/ml)                             | 1318.75 [350.00,2867.65] | 1129.50 [362.00,2824.00] | 0.802   |
| D-dimer (µg/ml)                               | 0.42 [0.22,0.82]         | 0.58 [0.23,1.14]         | 0.018   |
| ALT (IU/L)                                    | 20.0 [13.0,35.0]         | 25.0 [18.0,35.0]         | 0.001   |
| AST (IU/L)                                    | 24.0 [19.0,31.0]         | 25.0 [20.0,32.0]         | 0.493   |
| TB (µmol/L)                                   | 18.07 [12.90,27.57]      | 21.50 [15.64,32.70]      | 0.003   |
| DB (µmol/L)                                   | 3.90 [2.87,7.40]         | 4.85 [3.20,7.95]         | 0.029   |
| Creatinine (µmol/L)                           | 70.15 [61.00,80.07]      | 88.96 [77.40,97.39]      | <0.001  |
| Uric acid (µmol/L)                            | 381.46 [301.10,465.56]   | 449.37 [373.06,534.80]   | <0.001  |
| SaO <sub>2</sub> (%)                          | 89.4 [86.6,92.5]         | 90.9 [88.7,93.9]         | 0.001   |
| <b>Comorbidities</b>                          |                          |                          |         |
| Thrombophilia                                 | 8 (5.0)                  | 23 (12.1)                | 0.020   |
| APS                                           | 12 (7.5)                 | 14 (7.4)                 | 0.963   |
| CHD                                           | 6 (3.8)                  | 17 (9.0)                 | 0.05    |
| DM                                            | 4 (2.5)                  | 8 (4.2)                  | 0.381   |
| Hypertension                                  | 37 (23.1)                | 47 (24.7)                | 0.725   |
| Cancer                                        | 3 (1.9)                  | 1 (0.5)                  | 0.336   |

|                                   |            |            |       |
|-----------------------------------|------------|------------|-------|
| Anemia                            | 14 (8.8)   | 14 (7.4)   | 0.635 |
| <b>Targeted drug at diagnosis</b> |            |            | 0.528 |
| No drugs                          | 8 (5.0)    | 15 (7.9)   |       |
| Monotherapy                       | 54 (33.8)  | 65 (34.2)  |       |
| Combination therapy               | 98 (61.3)  | 110 (57.9) |       |
| <b>Main treatment modality</b>    |            |            | 0.038 |
| Targeted drug                     | 49 (30.6)  | 57 (30.0)  |       |
| PEA                               | 46 (28.8)  | 77 (40.5)  |       |
| BPA                               | 65 (40.6)  | 56 (29.5)  |       |
| <b>Anticoagulants</b>             |            |            | 0.043 |
| Warfarin                          | 55 (34.6)  | 86 (45.3)  |       |
| NOAC                              | 104 (65.4) | 104 (54.7) |       |
| <b>Death</b>                      | 22 (13.8)  | 23 (12.1)  | 0.647 |

Data are presented as mean±SD or n (%) or median [IQR].

CTEPH: chronic thromboembolic pulmonary hypertension; BMI: Body mass index ; VTE: Venous Thrombus Embolism; WHO FC: WHO function class; 6MWD: 6-minutes walking distance; PAP: pulmonary artery pressure; RAP: right atrial pressure; PAWP: pulmonary artery wedge pressure; PVR: pulmonary vascular resistance; CO: cardiac output; CI: cardiac index; SvO<sub>2</sub>: mixed venous oxygen saturation; HGB: hemoglobin; WBC: white blood cell; PLT: platelet; NT-proBNP : N-terminal pro brain natriuretic peptide; ALT: alanine aminotransferase; AST: aspartic transaminase; TB: total bilirubin; DB: direct bilirubin; Sao<sub>2</sub>: arterial oxygen saturation; APS: antiphospholipid syndrome; CHD: coronary heart disease; DM: Diabetes mellitus ; PEA: pulmonary endarterectomy; BPA: balloon pulmonary angioplasty; NOAC: novel oral anticoagulants.

**Table S2. Univariate COX proportional hazards regression analysis of risk factors for mortality in female patients.**

| Variables                                     | HR   | 95% CI    | P value |
|-----------------------------------------------|------|-----------|---------|
| <b>Characteristics</b>                        |      |           |         |
| Age                                           | 1.00 | 0.97-1.03 | 0.831   |
| BMI (kg/m <sup>2</sup> )                      | 0.91 | 0.80-1.04 | 0.156   |
| Smoking                                       | 0.00 | (0,inf)   | 0.993   |
| Alcohol Drinking                              | —    | —         | —       |
| History of VTE                                | 0.61 | 0.26-1.42 | 0.255   |
| Time from first symptom to diagnosis (months) | 1.00 | 1.00-1.01 | 0.192   |
| WHO FC III/IV                                 | 1.31 | 0.51-3.34 | 0.578   |
| 6MWD/20 (m)                                   | 0.92 | 0.86-0.99 | 0.018   |
| <b>Hemodynamics</b>                           |      |           |         |
| Systolic PAP (mmHg)                           | 1.00 | 0.98-1.02 | 0.773   |
| Diastolic PAP (mmHg)                          | 1.01 | 0.96-1.06 | 0.743   |
| mean PAP (mmHg)                               | 1.01 | 0.98-1.04 | 0.612   |
| mean RAP (mmHg)                               | 1.04 | 0.96-1.13 | 0.364   |
| PAWP (mmHg)                                   | 1.06 | 0.95-1.19 | 0.271   |

|                                |      |            |       |
|--------------------------------|------|------------|-------|
| PVR (Wood units)               | 1.05 | 0.96-1.14  | 0.290 |
| CO (L/min)                     | 0.82 | 0.56-1.21  | 0.316 |
| CI (L/(min.m <sup>2</sup> ))   | 0.82 | 0.41-1.64  | 0.565 |
| SvO <sub>2</sub> (%)           | 0.94 | 0.90-0.98  | 0.006 |
| <b>Laboratory tests</b>        |      |            |       |
| HGB (g/L)                      | 0.98 | 0.97-1.00  | 0.053 |
| PLT (×10 <sup>9</sup> )        | 1.00 | 0.99-1.00  | 0.431 |
| NT-proBNP/500<br>(ng/ml)       | 1.07 | 1.01-1.13  | 0.017 |
| D-dimer (μg/ml)                | 1.06 | 0.88-1.27  | 0.554 |
| TB (μmol/L)                    | 1.01 | 0.99-1.04  | 0.268 |
| DB (μmol/L)                    | 1.05 | 0.99-1.11  | 0.102 |
| Creatinine (μmol/L)            | 1.01 | 1.00-1.03  | 0.119 |
| Uric acid (μmol/L)             | 1.00 | 1.00-1.01  | 0.520 |
| Sao <sub>2</sub> (%)           | 1.00 | 0.93-1.07  | 0.994 |
| <b>Comorbidities</b>           |      |            |       |
| Thrombophilia                  | 0.95 | 0.13-7.09  | 0.960 |
| APS                            | 0.93 | 0.12-7.04  | 0.946 |
| CHD                            | 3.36 | 0.78-14.57 | 0.105 |
| DM                             | 1.35 | 0.18-10.17 | 0.769 |
| Hypertension                   | 0.64 | 0.22-1.91  | 0.427 |
| Cancer                         | 9.34 | 1.13-76.90 | 0.038 |
| Anemia                         | 2.80 | 1.02-7.70  | 0.046 |
| <b>Targeted drug</b>           | 1.10 | 0.54-2.27  | 0.791 |
| <b>Main treatment modality</b> |      |            |       |
| Targeted drug                  | Ref  | Ref        |       |
| PEA                            | 0.38 | 0.13-1.17  | 0.091 |
| BPA                            | 0.30 | 0.10-0.91  | 0.033 |
| <b>Anticoagulants</b>          |      |            |       |
| Warfarin                       | Ref  | Ref        |       |
| NOAC                           | 1.57 | 0.63-3.91  | 0.333 |

BMI: Body mass index ; VTE: Venous Thrombus Embolism; WHO FC: WHO function class; 6MWD: 6-minutes walking distance; PAP: pulmonary artery pressure; RAP: right atrial pressure; PAWP: pulmonary artery wedge pressure; PVR: pulmonary vascular resistance; CO: cardiac output; CI: cardiac index; SvO<sub>2</sub>: mixed venous oxygen saturation; HGB: hemoglobin; WBC: white blood cell; PLT: platelet; NT-proBNP : N-terminal pro brain natriuretic peptide; ALT: alanine aminotransferase; AST: aspartic transaminase; TB: total bilirubin; DB: direct bilirubin; Sao<sub>2</sub>: arterial oxygen saturation; APS: antiphospholipid syndrome; CHD: coronary heart disease; DM: Diabetes mellitus ; PEA: pulmonary endarterectomy; BPA: balloon pulmonary angioplasty; NOAC: novel oral anticoagulant; Ref: reference.

**Table S3. Clinical characteristics of female CTEPH Patients in each treatment group.**

| Variables                                     | Targeted drug (n=49) | PEA (n=46)          | BPA (n=65)          | <i>P1</i> | <i>P2</i> | <i>P3</i> |
|-----------------------------------------------|----------------------|---------------------|---------------------|-----------|-----------|-----------|
| <b>Characteristics</b>                        |                      |                     |                     |           |           |           |
| Age                                           | 58.0±12.9            | 47.8±11.8           | 57.2 14.1           | <0.001    | 0.758     | <0.001    |
| BMI (kg/m <sup>2</sup> )                      | 24.2±3.1             | 23.0±3.6            | 23.6±3.1            | 0.095     | 0.333     | 0.353     |
| Smoking                                       | 0 (0.0)              | 1 (2.2)             | 1 (1.5)             | 0.484     | >0.999    | >0.999    |
| Alcohol Drinking                              | 0 (0.0)              | 0 (0.0)             | 0 (0.0)             | -         | -         | -         |
| History of VTE                                | 34 (69.4)            | 33 (71.7)           | 46 (70.8)           | 0.826     | 0.873     | 0.912     |
| Time from first symptom to diagnosis (months) | 27.3 [12.2,60.4]     | 11.6 [6.13,36.53]   | 33.9 [12.2,73.6]    | 0.007     | 0.473     | 0.001     |
| WHO FC III/IV                                 | 32 (65.3)            | 30 (65.2)           | 46 (70.8)           | 0.993     | 0.535     | 0.535     |
| 6MWD (m)                                      | 357.0 [342.0,442.0]  | 408.0 [342.0,443.0] | 370.0 [327.0,442.0] | 0.201     | 0.818     | 0.115     |
| <b>Hemodynamics</b>                           |                      |                     |                     |           |           |           |
| Systolic PAP (mmHg)                           | 86.3±23.0            | 81.8±23.6           | 85.5±24.3           | 0.342     | 0.847     | 0.426     |
| Diastolic PAP (mmHg)                          | 31.0 [26.0,39.0]     | 29.0 [23.0,33.0]    | 31.0 [27.0,38.0]    | 0.159     | 0.932     | 0.099     |
| mean PAP (mmHg)                               | 52.0±13.3            | 48.6±13.2           | 50.9±12.6           | 0.211     | 0.648     | 0.351     |
| mean RAP (mmHg)                               | 7.0 [5.0,11.0]       | 6.0 [4.0 ,9.0]      | 7.0 [4.0,10.0]      | 0.099     | 0.776     | 0.189     |
| PAWP (mmHg)                                   | 9.0 [8.0,11.0]       | 10.0 [8.0,11.0]     | 10.0 [8.0,12.0]     | 0.922     | 0.519     | 0.357     |
| PVR (Wood units)                              | 10.3 [8.1,13.3]      | 8.26 [6.33,10.53]   | 9.41 [6.71,12.41]   | 0.053     | 0.312     | 0.262     |
| CO (L/min)                                    | 4.10 [3.67,4.60]     | 4.38 [4.07,5.13]    | 4.17 [3.47,5.13]    | 0.032     | 0.405     | 0.238     |
| CI (L/(min.m <sup>2</sup> ))                  | 2.41 [2.17,2.72]     | 2.55[2.28,3.06]     | 2.52 [2.09,2.96]    | 0.069     | 0.725     | 0.405     |
| Svo <sub>2</sub> (%)                          | 61.8 [57.7,65.1]     | 60.6 [56.3,65.5]    | 62.0 [55.9,67.5]    | 0.979     | 0.413     | 0.765     |
| <b>Laboratory tests</b>                       |                      |                     |                     |           |           |           |
| HGB (g/L)                                     | 141.0[129.0,147.0]   | 141.0 [118.0,159.0] | 145.0 [131.0,158.0] | 0.829     | 0.279     | 0.563     |

|                                           |                             |                        |                        |        |        |        |
|-------------------------------------------|-----------------------------|------------------------|------------------------|--------|--------|--------|
| WBC ( $\times 10^9$ )                     | 5.63 [4.94,6.65]            | 5.73 [4.75,7.68]       | 5.78 [4.65,7.03]       | 0.663  | 0.891  | 0.664  |
| PLT ( $\times 10^9$ )                     | 192.0 [162.0,258.0]         | 216.5 [171.0,273.0]    | 198.0 [155.0,244.0]    | 0.214  | 0.742  | 0.135  |
| NT-proBNP (ng/ml)                         | 1396.80<br>[560.30,2877.30] | 1579.5 [310.8,2688.0]  | 1186.0 [227.0,2941.0]  | 0.704  | 0.520  | 0.728  |
| D-dimer ( $\mu\text{g/ml}$ )              | 0.38 [0.20,0.80]            | 0.56 [0.26,0.93]       | 0.36 [0.17,0.75]       | 0.153  | 0.961  | 0.097  |
| ALT (IU/L)                                | 22.0 [14.0,35.0]            | 26.0 [13.0,41.0]       | 16.5 [12.0,25.5]       | 0.520  | 0.173  | 0.128  |
| AST (IU/L)                                | 21.0 [18.0,31.0]            | 26.0 [21.0,32.0]       | 16.5 [12.0,25.5]       | 0.053  | 0.229  | 0.348  |
| ALP (IU/L)                                | 67.0 [54.0,77.0]            | 79.0 [63.0,100.0]      | 65.0 [53.0,81.0]       | 0.004  | 0.898  | 0.006  |
| Total bilirubin<br>( $\mu\text{mol/L}$ )  | 20.00 [14.30,29.60]         | 14.21 [10.75,20.19]    | 18.30 [13.21,28.90]    | 0.009  | 0.375  | 0.072  |
| Direct bilirubin<br>( $\mu\text{mol/L}$ ) | 3.60 [2.90,7.20]            | 3.10 [2.40,4.90]       | 4.58 [3.25,8.28]       | 0.115  | 0.160  | 0.007  |
| Creatinine ( $\mu\text{mol/L}$ )          | 66.89 [55.90,73.66]         | 69.00 [60.31,80.07]    | 76.0 [66.8,84.0]       | 0.249  | <0.001 | 0.032  |
| Uric acid ( $\mu\text{mol/L}$ )           | 364.10 [284.7,446.44]       | 375.63 [286.64,459.51] | 400.05 [337.50,467.28] | 0.719  | 0.112  | 0.371  |
| Sao <sub>2</sub> (%)                      | 89.4 [87.3,92.4]            | 90.0 [86.7,93.1]       | 89.3 [85.9,91.8]       | 0.718  | 0.413  | 0.302  |
| <b>Comorbidities</b>                      |                             |                        |                        |        |        |        |
| Thrombophilia                             | 1 (2.0)                     | 4 (8.7)                | 3 (4.6)                | 0.195  | 0.633  | 0.446  |
| APS                                       | 3 (6.1)                     | 4 (8.7)                | 5 (7.7)                | 0.709  | >0.999 | >0.999 |
| Coronary disease                          | 4 (8.2)                     | 0 (0.0)                | 2 (3.1)                | 0.118  | 0.400  | 0.510  |
| Diabetes mellitus                         | 2 (4.1)                     | 0 (0.0)                | 2 (3.1)                | 0.495  | >0.999 | 0.510  |
| Hypertension                              | 16 (32.7)                   | 5 (10.9)               | 16 (24.6)              | 0.011  | 0.344  | 0.069  |
| Gastrointestinal<br>disease               | 2 (4.1)                     | 1 (2.2)                | 7 (10.8)               | >0.999 | 0.296  | 0.137  |
| Chronic kidney<br>disease                 | 0 (0.0)                     | 0 (0.0)                | 1 (1.5)                | -      | >0.999 | >0.999 |
| Cancer                                    | 2 (4.1)                     | 0 (0.0)                | 1 (1.5)                | 0.495  | 0.576  | >0.999 |

|                                   |           |           |           |        |        |        |
|-----------------------------------|-----------|-----------|-----------|--------|--------|--------|
| Hyperhomocysteinemia              | 11 (22.5) | 4 (8.7)   | 36 (55.4) | 0.066  | <0.001 | <0.001 |
| Anemia                            | 4 (8.2)   | 5 (10.9)  | 5 (7.7)   | 0.735  | >0.999 | 0.739  |
| <b>Targeted drug at diagnosis</b> |           |           |           | 0.004  | <0.001 | 0.044  |
| No drugs                          | 0 (0.0)   | 69 (13.0) | 2 (3.1)   |        |        |        |
| Monotherapy                       | 27 (55.1) | 14 (30.4) | 13 (20.0) |        |        |        |
| Combination therapy               | 22 (44.9) | 26 (56.5) | 50 (76.9) |        |        |        |
| <b>Anticoagulants</b>             |           |           |           | 0.847  | <0.001 | <0.001 |
| Warfarin                          | 22 (45.8) | 22 (47.8) | 11 (16.9) |        |        |        |
| NOAC                              | 26 (54.2) | 24 (52.2) | 54 (83.1) |        |        |        |
| <b>Combination Medicine</b>       |           |           |           |        |        |        |
| Antiplatelet                      | 3 (6.1)   | 1 (2.2)   | 4 (6.2)   | 0.618  | >0.999 | 0.401  |
| NASID                             | 1 (2.0)   | 2 (4.4)   | 1 (1.5)   | 0.609  | >0.999 | 0.569  |
| Steroidhormones                   | 1 (2.0)   | 5 (10.9)  | 4 (6.2)   | 0.104  | 0.389  | 0.485  |
| CCB                               | 1 (2.0)   | 0 (0.0)   | 1 (1.5)   | >0.999 | >0.999 | >0.999 |
| Diuretic                          | 41 (83.7) | 41 (89.1) | 61 (93.9) | 0.439  | 0.080  | >0.999 |
| Digoxin                           | 26 (53.1) | 28 (60.9) | 41 (63.1) | 0.443  | 0.282  | 0.813  |
| IVC filter                        | 4 (8.2)   | 11 (23.9) | 4 (6.2)   | 0.035  | 0.724  | 0.007  |

Data are presented as mean±SD or n (%) or median [IQR]. CTEPH: chronic thromboembolic pulmonary hypertension; BMI: Body mass index ; VTE: Venous Thrombus Embolism; WHO FC: WHO function class; 6MWD: 6-minutes walking distance; PAP: pulmonary artery pressure; RAP: right atrial pressure; PAWP: pulmonary artery wedge pressure; PVR: pulmonary vascular resistance; CO: cardiac output; CI: cardiac index; SvO<sub>2</sub>: mixed venous oxygen saturation; HGB: hemoglobin; WBC: white blood cell; PLT: platelet; NT-proBNP : N-terminal pro brain natriuretic peptide; ALT: alanine aminotransferase; AST: aspartic transaminase; TB: total bilirubin; DB: direct bilirubin; Sao<sub>2</sub>: arterial oxygen saturation; APS: antiphospholipid syndrome; CHD: coronary heart disease; DM: Diabetes mellitus ; PEA: pulmonary endarterectomy; BPA: balloon pulmonary angioplasty; NOAC: novel oral anticoagulants. *P1*: the *P* value between patients receiving targeted drug along and patients receiving PEA; *P2*: the *P* value between patients receiving targeted drug along and patients receiving BPA; *P3*: the *P* value between patients receiving PEA and patients receiving BPA. *P* <0.017 (Bonferroni correction) was consider significance.

**Table S4. The results of sensitivity analysis.**

| Variables                                     | HR   | 95% CI     | P value |
|-----------------------------------------------|------|------------|---------|
| Age                                           | 1.00 | 0.96-1.04  | 0.997   |
| BMI (kg/m <sup>2</sup> )                      | 0.92 | 0.78-1.09  | 0.357   |
| 6MWD/20 (m)                                   | 0.96 | 0.89-1.04  | 0.310   |
| Svo <sub>2</sub> (%)                          | 0.98 | 0.92-1.05  | 0.546   |
| NT-proBNP/500 (ng/ml)                         | 1.09 | 1.00-1.19  | 0.050   |
| Cancer                                        | 4.97 | 0.48-51.76 | 0.180   |
| Anemia                                        | 4.96 | 1.33-18.40 | 0.017   |
| Time from first symptom to diagnosis (months) | 1.00 | 0.99-1.01  | 0.689   |
| Anticoagulants                                | 1.67 | 0.61-4.57  | 0.317   |
| <b>Main treatment modality</b>                |      |            |         |
| Targeted drug                                 | Ref  | Ref        | -       |
| PEA                                           | 0.25 | 0.06-0.99  | 0.049   |
| BPA                                           | 0.13 | 0.03-0.60  | 0.009   |

Multivariate Cox analysis after adjusting the confounders (age and BMI) and survival-related factors. BMI: Body mass index; 6MWD/20: 6-min walk distance, per 20m increase in distance; SvO<sub>2</sub>: mixed venous oxygen saturation; NT-proBNP/500: N-terminal pro-brain natriuretic peptide, per 500 ng/ml increase in concentration; PEA: pulmonary endarterectomy; BPA: balloon pulmonary angioplasty.
